# Supplementary material for: Sustained ERK1/2 but not STAT1 or 3 activation is required for thanatophoric dysplasia phenotypes in PC12 cells
Source: Oxford University Press journal article supplement (doi:10.1093/hmg/ddi161), 2005-04-20
Supplement: ddi161_Supplementary_Data.zip [file ddi161_Supplementary_Data.zip]

Archive with 1 entries (1 files):
- ddi161_Nowroozi_et_al_HMG-2005W-0010_supplemental_information.pdf
