# Supplementary material for: Sustained ERK1/2 but not STAT1 or 3 activation is required for thanatophoric dysplasia phenotypes in PC12 cells
Source: Oxford University Press journal article supplement (doi:10.1093/hmg/ddi161), 2005-04-20
Supplement: ddi161_Supplementary_Data.zip [file ddi161_Supplementary_Data.zip › ddi161_Nowroozi_et_al_HMG-2005W-0010_supplemental_information.pdf]

## SUPPLEMENTAL INFORMATION

### **Gene expression profiling of PFR3<sup>K650E</sup> expressing cells highlights constitutive activation of signaling pathways**

Through multiple lines of research, knowledge regarding the signaling networks and signaling molecules activated by ligand stimulation of FGFRs has emerged (6, 39). To investigate signaling pathways activated by FGFR3 mutations through an analysis of altered expression of downstream transcriptional targets, we performed gene expression profiling of stably transfected inducible PC12 cells expressing a chimeric receptor (PFR3) consisting of the extracellular domain of human platelet derived growth factor receptor (PDGFR) and the transmembrane and intracellular domains of human FGFR3 (36) (described in main text).

Rat Affymetrix GeneChips were performed on induced PFR3<sup>K650E</sup> verses induced PFR3 cells and comparison analyses were generated. To simplify discussion, genes which showed altered expression were placed in broad functional groups; major categories include metabolism [e.g. carbohydrate metabolism (galactosyltransferase, UDP galactose epimerase, GLUT1, aldehyde dehydrogenase), and oxygen metabolism (e.g., isocitrate dehydrogenase 1, ATP synthase, ATPase)], cell cycle regulation (e.g. cyclin D1, cyclin D2, p21<sup>WAF1/CIP1</sup>), signaling [(e.g. FGFR1, TGFβ1, acetylcholine receptor, MAPKK, early growth response1 (egr1)], and cytoskeleton proteins (e.g. myosin heavy chain) (Table 1). Overall we found 65 genes with altered expression (i.e. 52 with increased expression and 13 with decreased expression). Furthermore overall gene expression differences (i.e. Fold Change) were small: 86% (45/52) of genes with increased expression were ≤ +3-fold and 96% (12/13) of genes with decreased expression were ≥ -3-fold. These results suggest that in our PC12 model, PFR3<sup>K650E</sup>, the mutant receptor causes modest alterations in transcription.

The expression of 4 genes, aldehyde dehydrogenase, cyclin D2, egr1, and p21<sup>WAF1/CIP1</sup> was evaluated by Northern blot and approximate fold change and direction of change for each was confirmed (data not shown and see below). One of the upregulated genes, p21<sup>WAF1/CIP1</sup>, induced 1.7 fold, was confirmed by both Northern (1.4 fold) and Western blot analyses (Fig. 1). This gene was of particular interest as

p21<sup>WAF1/CIP1</sup> induction triggers cell growth arrest and is a downstream target of STAT1 and ERK1/2 signaling, implicated in FGFR3-mediated skeletal dysplasias. Indeed, expression changes of the majority of the altered genes are consistent with activation of ERK and/or STAT signaling, including genes such as *egr1*, p21<sup>WAF1/CIP1</sup>, and MAP kinase phosphatase 1 (MKP-1). A number of genes are in common with those activated upon NGF treatment of PC12 cells (indicated by asterisk in Table 1) (40), associated with MAPK signaling. Cyclin D1, typically an ERK1/2 and STAT3 target gene, was found to be decreased in expression along with cyclin D2. Both of these proteins are upregulated in human cancers where proliferation is dysregulated (41); the observed downregulation is consistent with cell cycle arrest and ligand-independent differentiation observed in the K650E expressing cells. Finally, carbohydrate and lipid metabolism can also be regulated through the action of ERK1/2 and STAT signaling (42, 43). Several induced genes are also in common with those identified by gene expression profiling in the presence of FGF in rat chondrosarcoma (RCS) cells, a chondrocyte cell line that primarily expresses the FGFR3 form of the FGF receptor types (44). Therefore, gene expression profiling of ligand-independent signaling is most consistent with an enhancement of normal FGFR3 signaling that can occur in the presence of ligand, as opposed to the activation of novel signaling pathways.

## **Materials and Methods**

### **RNA sample preparation and microarrays**

For gene expression profiling studies three clones of each line (see above), PFR3 or PFR3<sup>K650E</sup> cells, were plated in 150-mm plates and the following day induced for 24 hr. Total RNA was isolated separately for each clone using Trizol Reagent according to the manufacturer (Invitrogen). RNA was quantitated spectrophotometrically and integrity tested by capillary electrophoresis (Agilent 2100 Bioanalyzer). Equal amounts of RNA from each clone of mutant and wild type lines were pooled and a total of 25 µg total RNA was used to generate target cRNAs for hybridization to Affymetrix Rat Genome U34A oligonucleotide arrays (UCI DNA Array Core Facility). Three separate cell growths were done for each clone and cRNAs were synthesized from the pooled RNAs separately and triplicate GeneChips were done.

For all the GeneChips, the average fluorescence intensity was scaled to 500 arbitrary units so that chips could be directly compared. All 9 possible pairwise comparisons were made between induced PFR3 and PFR3<sup>K650E</sup> lines using the Affymetrix Microarray Suite v5.0 (Santa Clara, CA). Genes were considered significant if 50% of the pairwise comparisons were called changed (i.e. Difference Call was increased, moderately increased, decreased or moderately decreased). MAS v5.0 Signal Log Ratio values were converted to fold change values and averaged across all pairwise comparisons. Probe pairs were selected that had an average fold change of at least +/- 1.5.

| Table 1.                                     |                                                                  |      |
|----------------------------------------------|------------------------------------------------------------------|------|
| GenBank #                                    | Gene Product                                                     | FC   |
| <b><i>Stress Response</i></b>                |                                                                  |      |
| S63521                                       | glucose-regulated protein GRP78                                  | 4.3  |
| S81478                                       | * 3CH134/CL100 PTPase, MKP-1                                     | 1.5  |
| <b><i>Cytoskeletal</i></b>                   |                                                                  |      |
| M12098                                       | embryonic sarcomeric myosin heavy chain                          | 5.3  |
| X03369                                       | beta-tubulin T beta15                                            | 1.9  |
| AA818677                                     | neurofilament, heavy polypeptide                                 | 3.1  |
| J02962                                       | lectin, galactose binding, soluble 3                             | 2.1  |
| AA800948                                     | similar to Tubulin alpha-4 chain                                 | 2.4  |
| L13039                                       | calpactin I heavy chain                                          | 1.7  |
| <b><i>Growth Factors/Signaling</i></b>       |                                                                  |      |
| L04485                                       | MAP kinase kinase                                                | 1.5  |
| L31621                                       | cholinergic receptor, nicotinic, alpha polypeptide 3             | 1.5  |
| J05231                                       | cholinergic receptor, nicotinic, alpha polypeptide 5             | 1.9  |
| D37880                                       | TYRO3 protein tyrosine kinase 3                                  | 2.3  |
| M18416, AF023087, U75397                     | * early growth response 1                                        | 3.1  |
| M74223                                       | VGF nerve growth factor inducible                                | 1.5  |
| S54008                                       | Fibroblast growth factor receptor 1                              | 2.9  |
| AI071299, AI172476                           | TGFB inducible early growth response                             | 1.8  |
| X52498                                       | * transforming growth factor, beta 1                             | 3.4  |
| AI007824                                     | similar to Guanine nucleotide exchange factor MSS4               | 1.6  |
| X06916                                       | * S100 calcium-binding protein A4                                | 1.6  |
| D00575                                       | glycoprotein hormones, alpha subunit                             | 1.6  |
| AA859878, AI639318                           | * ret proto-oncogene                                             | 1.8  |
| X77235                                       | ADP-ribosylation-like 4                                          | 1.5  |
| M83679                                       | RAB15                                                            | 2.4  |
| AA799551                                     | similar to Rab family small GTPase Rah                           | -3.3 |
| U27767                                       | regulator of G-protein signaling 4                               | -1.5 |
| AI175776                                     | retroviral-like c-Ha-ras proto-oncogene                          | -2.5 |
| <b><i>Cell cycle/Replication</i></b>         |                                                                  |      |
| U24174                                       | p21WAF1/CIP1                                                     | 1.7  |
| D14014, X75207                               | cyclin D1                                                        | -1.6 |
| AA899106                                     | cyclin D2                                                        | -2.9 |
| <b><i>Transcription/Translation</i></b>      |                                                                  |      |
| AF009330                                     | enhancer-of-split and hairy-related protein 2 (SHARP)            | 1.5  |
| U83883                                       | p105 coactivator                                                 | 1.5  |
| AF104399                                     | melanocyte-specific gene 1 protein                               | 1.9  |
| AI178828                                     | eukaryotic translation initiation factor 4E binding protein      | 1.8  |
| <b><i>Metabolism</i></b>                     |                                                                  |      |
| AF048687                                     | UDP-Gal:betaGlcNAc beta, polypeptide 6                           | 2.3  |
| D26073                                       | PRPP synthetase-associated protein                               | 6.3  |
| D37920                                       | squalene epoxidase                                               | 1.7  |
| J02585                                       | stearyl-Coenzyme A desaturase 1                                  | 1.9  |
| M29249                                       | hydroxy-3-methylglutaryl coenzyme A reductase                    | 1.8  |
| M58364                                       | GTP cyclohydrolase 1                                             | 1.8  |
| X53949                                       | galactose-4-epimerase, UDP                                       | 1.6  |
| AA875269                                     | stearyl-Coenzyme A desaturase 2                                  | 1.6  |
| AA892314                                     | isocitrate dehydrogenase 1                                       | 1.7  |
| U81186                                       | 17 beta-hydroxysteroid dehydrogenase type 3                      | 1.5  |
| AA799778                                     | ATP synthase, H <sup>+</sup> transporting, F0 complex, subunit b | 1.9  |
| Y12635                                       | ATPase, H <sup>+</sup> transporting, beta 56/58 kDa              | 1.5  |
| S68135                                       | GLUT1=glucose transporter 1                                      | 1.5  |
| AF065438                                     | peptidylprolyl isomerase C-associated protein                    | -1.5 |
| AF097723                                     | plasma glutamate carboxypeptidase                                | -1.8 |
| AF001898                                     | aldehyde dehydrogenase family 1, member A1                       | -2.9 |
| <b><i>Protein Turnover</i></b>               |                                                                  |      |
| D17296                                       | ubiquitin C                                                      | -1.9 |
| <b><i>Miscellaneous and Unidentified</i></b> |                                                                  |      |
| X05472                                       | Rat 2.4 kb repeat DNA right terminal region                      | 3.8  |
| X76489                                       | CD9 antigen                                                      | 2.1  |
| X62875                                       | high mobility group AT-hook 1                                    | 2.2  |
| AA892511                                     | similar to Tescalcin                                             | 1.5  |
| E12625                                       | novel protein which is expressed with nerve injury               | 1.8  |
| U03416                                       | neuronal olfactomedin-related ER localized protein               | 1.6  |
| AA800315                                     | similar to PxF protein                                           | 6.0  |
| H31479                                       | similar to RA175                                                 | 1.6  |
| AA893032                                     | EST                                                              | 1.6  |
| AA893454                                     | EST                                                              | 1.7  |
| AA874848                                     | EST                                                              | 1.7  |
| AA874803                                     | EST                                                              | -1.9 |
| AA874803                                     | EST                                                              | -1.7 |
| AA874873                                     | EST                                                              | -2.0 |
| AI639312                                     | EST                                                              | -1.9 |
| * denote NGF-inducible genes                 |                                                                  |      |

**Table S1.** Genes with altered expression in induced PFR3<sup>K650E</sup> (mutant) cells relative to induced PFR3 (wildtype) cells. Affymetrix U34A GeneChips were probed with cRNA synthesized from RNA from mutant or wildtype cells induced for 24 hr as described in the Materials and Methods. Genes listed in the table were called changed in at least 50% of the pairwise comparisons using MAS v5.0 software. FC refers to the average fold change values determined in MAS v5.0 for all possible pairwise comparisons. For cases where multiple probe pair sets were identified for the same gene, the corresponding Genbank Accession Numbers are given and the fold change is the average for all probe sets. Only genes with average fold changes less than -1.5 or greater than +1.5 were considered. \* denote NGF-inducible genes.
